# Supplementary material for: Antimicrobial and Synergistic Effects of Commercial Piperine and Piperlongumine in Combination with Conventional Antimicrobials
Source: MDPI journal article supplement (doi:10.3390/antibiotics8020055), 2019-05-04
Supplement: s1 [file s1]

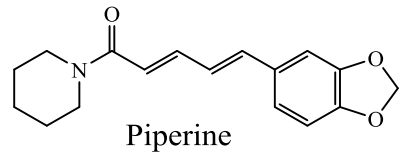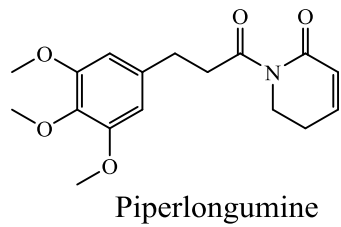

+

Conventional antimicrobials  
(rifampicin, tetracycline and  
itraconazole)

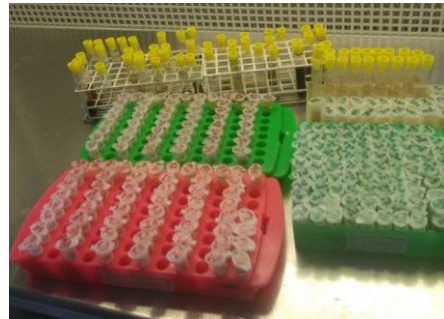

Synergistic evaluation against  
*S. aureus*, *P. aeruginosa* and *C. albicans*

Synergistic effect is  
dependent on the ratio of  
combination of  
piperamide/antimicrobial.
